# Supplementary material for: Major Bleeding Events Are Stronger Predictors of Long-Term Mortality Than Coronary Events in Secondary Prevention Therapy for Ischaemic Heart Disease
Source: Hindawi journal article supplement (doi:10.1155/2020/9303750), 2020-11-30

## Supplementary Materials

**Table S1.** Current morbidity, risk factor control, and medication for patients with ischaemic heart disease

| <b>Risk Factor, %</b>      |           |              |
|----------------------------|-----------|--------------|
| Hypertension               |           | 93.0%        |
| Diabetes mellitus          |           | 36.1%        |
| Dyslipidaemia              |           | 95.4%        |
| <b>Risk factor control</b> |           |              |
| BP, mmHg                   | Systolic  | 133.7 ± 16.5 |
|                            | Diastolic | 75.0 ± 11.8  |
| HbA1c in DM patients, %    |           | 7.0 ± 1.1    |
| LDL-C, mg/dL               |           | 88.0 ± 21.3  |
| <b>Medication, %</b>       |           |              |
| Antiplatelet therapy       |           |              |
| Aspirin                    |           | 82.0%        |
| Thienopyridine             |           | 26.3%        |
| Cilostazol                 |           | 1.9%         |
| Single                     |           | 40.4%        |
| Dual                       |           | 52.3%        |
| Triple                     |           | 0.1%         |
| OAC                        |           |              |
| VKA                        |           | 8.3%         |
| DOAC                       |           | 3.4%         |
| SAPT + OAC                 |           | 8.9%         |
| DAPT + OAC                 |           | 0.9%         |
| Statin                     |           | 90.0%        |
| EPA                        |           | 6.0%         |
| ACEI, ARB                  |           | 63.0%        |
| Beta-blocker               |           | 27.0%        |
| CCB                        |           | 66.7%        |

Abbreviations: BP, blood pressure; HbA1c, glycated haemoglobin; LDL-C, low-density lipoprotein cholesterol; OAC, oral anticoagulation; VKA, vitamin K antagonist; DOAC, direct oral anticoagulant;

SAPT, single antiplatelet therapy; DAPT, dual antiplatelet therapy; EPA, eicosapentaenoic acid; ACEI, angiotensin-converting enzyme inhibitor; ARB, angiotensin receptor blocker; CCB, calcium channel blocker.

**Figure S1.** The Kaplan–Meier analysis for all cause death with or without myocardial infarction

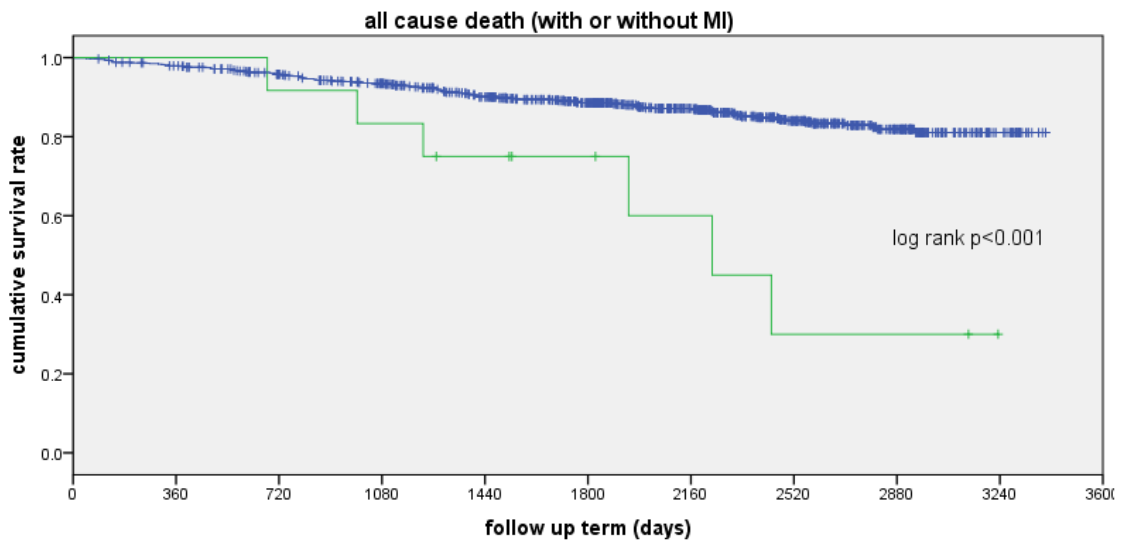

Abbreviations: MI, myocardial infarction.

**Figure S2.** The Kaplan–Meier analysis for all cause death with or without ventricular arrhythmia

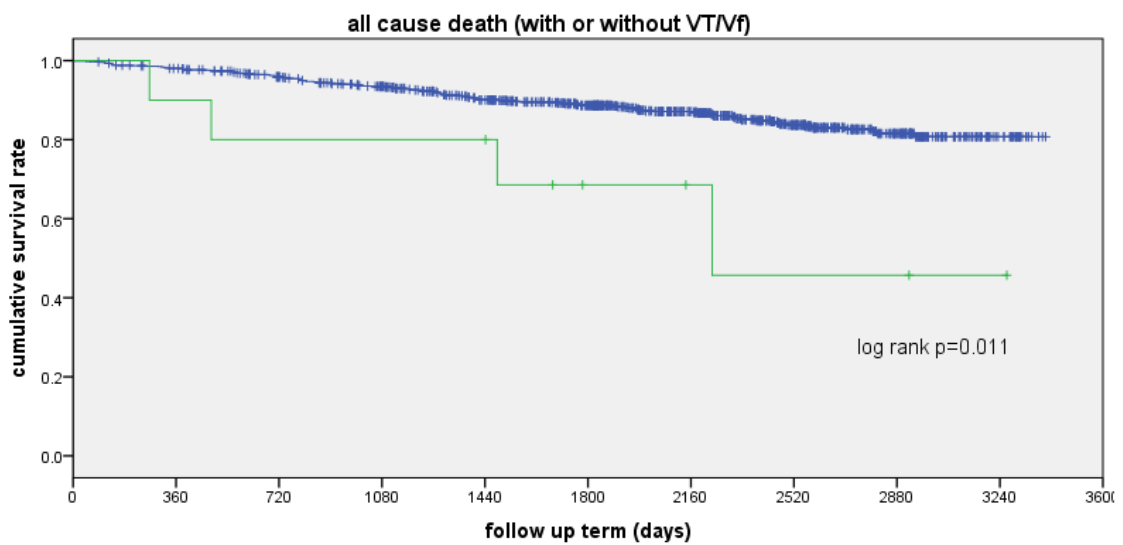

Abbreviations: VT, ventricular arrhythmia; Vf, ventricular fibrillation.

**Figure S3.** The Kaplan–Meier analysis for all cause death with or without intracranial haemorrhage

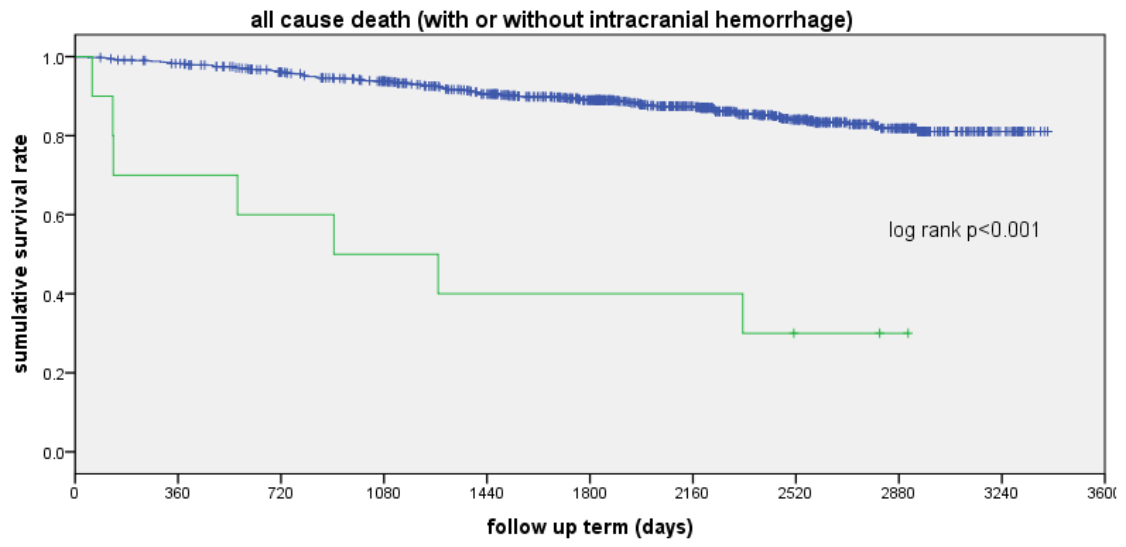

Supplement: f1 [file 9303750.f1.pdf]
